# Supplementary material for: Smoking, Smoking Cessation, and Measures of Subclinical Atherosclerosis in Multiple Vascular Beds in Japanese Men
Source: PubMed Central journal article supplement — J Am Heart Assoc. 2016 Aug 29;5(9):e003738. doi: 10.1161/JAHA.116.003738 (PMC5079033; doi:10.1161/jaha.116.003738), 2016-08-29
Supplement: JAH3-5-e003738-s001.pdf [file JAH3-5-e003738-s001.pdf]

**SUPPLEMENTAL MATERIAL**

**Table S1.** Association of cumulative smoking exposure by pack-years with subclinical atherosclerosis in the carotid, coronary, aortic, and peripheral vascular beds in 509 former smokers (SESSA, Shiga, Japan, 2006–2008)

|                                         | Never      | Pack-years in former smokers |                     |                   | <i>P</i> for trend |
|-----------------------------------------|------------|------------------------------|---------------------|-------------------|--------------------|
|                                         | (n = 181)  | <16.1 (n = 171)              | 16.1–36.2 (n = 169) | ≥36.3 (n = 169)   |                    |
| CIMT >1.0 mm, n (%)§                    | 22 (12.6)  | 20 (11.9)                    | 40 (24.2)           | 45 (27.3)         |                    |
| OR                                      | 1 (ref)    | 1.27 (0.63–2.54)             | 2.2 (1.18–4.10)*    | 2.28 (1.24–4.21)† | 0.003              |
| Carotid plaque, median<br>(25th, 75th)§ | 2 (0, 3)   | 1 (0, 3)                     | 2 (1, 4)            | 3 (2, 5)          |                    |
| Ratio of expected counts                | 1 (ref)    | 1.02 (0.84–1.25)             | 1.31 (1.08–1.58)†   | 1.57 (1.30–1.88)‡ | <0.001             |
| CAC >0, n (%)                           | 108 (59.7) | 96 (56.1)                    | 110 (65.1)          | 126 (74.6)        |                    |
| OR                                      | 1 (ref)    | 1.00 (0.61–1.62)             | 1.07 (0.65–1.75)    | 1.37 (0.82–2.28)  | 0.175              |

|                         |            |                  |                   |                    |        |
|-------------------------|------------|------------------|-------------------|--------------------|--------|
| CAC $\geq$ 100, n (%)   | 34 (18.8)  | 28 (16.4)        | 47 (27.8)         | 49 (29.0)          |        |
| OR                      | 1 (ref)    | 1.06 (0.58–1.94) | 1.49 (0.85–2.60)  | 1.41 (0.82–2.44)   | 0.149  |
| CAC $\geq$ 400, n (%)   | 11 (6.1)   | 8 (4.7)          | 16 (9.5)          | 22 (13.0)          |        |
| OR                      | 1 (ref)    | 1.04 (0.39–2.82) | 1.32 (0.56–3.11)  | 1.89 (0.83–4.30)   | 0.048  |
| ABI <1.1, n (%)         | 45 (24.9)  | 46 (26.9)        | 53 (31.4)         | 67 (39.6)          |        |
| OR                      | 1 (ref)    | 1.15 (0.7–1.87)  | 1.26 (0.78–2.03)  | 1.76 (1.09–2.82)*  | 0.013  |
| AoAC >0, n (%)          | 132 (72.9) | 134 (78.4)       | 146 (86.4)        | 162 (95.9)         |        |
| OR                      | 1 (ref)    | 1.84 (0.95–3.56) | 2.36 (1.13–4.93)* | 5.57 (2.16–14.39)‡ | <0.001 |
| AoAC $\geq$ 100, n (%)  | 98 (54.1)  | 83 (48.5)        | 119 (70.4)        | 146 (86.4)         |        |
| OR                      | 1 (ref)    | 0.88 (0.52–1.49) | 1.96 (1.12–3.46)* | 4.44 (2.37–8.30)‡  | <0.001 |
| AoAC $\geq$ 1000, n (%) | 30 (16.6)  | 33 (19.3)        | 56 (33.1)         | 82 (48.5)          |        |
| OR                      | 1 (ref)    | 1.58 (0.85–2.95) | 2.18 (1.21–3.92)† | 4.38 (2.48–7.75)‡  | <0.001 |

Pack-years groups were categorized according to tertiles of pack-years in former smokers. All abbreviations are shown in Table 2. All values are expressed as ORs and ratios of expected counts with 95% confidence intervals. For dichotomous outcomes, logistic regression was used. For carotid plaque, negative binomial regression was used. Adjusted covariates are shown in Table 2.

\* $P < 0.05$ ; † $P < 0.01$ , ‡ $P < 0.001$ .

§987 (never, 174; former, 498 [pack-years <16.1, 168; 16.1–36.2, 165; ≥36.3, 165]) men underwent measurement of carotid atherosclerosis.

**Table S2.** Association of smoking intensity by daily cigarette consumption with subclinical atherosclerosis in the carotid, coronary, aortic, and peripheral vascular beds in 1019 men (SESSA, Shiga, Japan, 2006–2008)

|                                         | Never<br>(n =<br>181) | Daily cigarette consumption in former smokers |                      |                      | <i>P</i> for<br>trend | Daily cigarette consumption in current smokers |                      |                      | <i>P</i> for<br>trend |
|-----------------------------------------|-----------------------|-----------------------------------------------|----------------------|----------------------|-----------------------|------------------------------------------------|----------------------|----------------------|-----------------------|
|                                         |                       | <20 (n = 167)                                 | 20 (n = 194)         | ≥21 (n = 148)        |                       | <16 (n = 111)                                  | 16–20 (n = 123)      | ≥21 (n = 95)         |                       |
| CIMT >1.0 mm, n (%)§                    | 22 (12.6)             | 34 (20.7)                                     | 40 (21.3)            | 31 (21.2)            |                       | 15 (14.4)                                      | 15 (12.7)            | 15 (16.1)            |                       |
| OR                                      | 1 (ref)               | 1.64<br>(0.87–3.11)                           | 2.18<br>(1.17–4.06)* | 2.04<br>(1.06–3.95)* | 0.019                 | 1.55<br>(0.71–3.36)                            | 1.74<br>(0.80–3.79)  | 2.76<br>(1.23–6.20)* | 0.016                 |
| Carotid plaque, median<br>(25th, 75th)§ | 2 (0, 3)              | 2 (1, 3)                                      | 2 (1, 4)             | 2 (1, 5)             |                       | 1 (0, 4)                                       | 2 (0, 4)             | 2 (1, 4)             |                       |
| Ratio of expected<br>counts             | 1 (ref)               | 1.03<br>(0.85–1.26)                           | 1.33<br>(1.11–1.60)† | 1.57<br>(1.29–1.90)‡ | <0.001                | 1.23<br>(0.98–1.53)                            | 1.41<br>(1.13–1.75)† | 1.67<br>(1.33–2.09)‡ | <0.001                |

|                 |               |                     |                     |                     |       |                      |                     |                      |       |
|-----------------|---------------|---------------------|---------------------|---------------------|-------|----------------------|---------------------|----------------------|-------|
| CAC >0, n (%)   | 108<br>(59.7) | 108 (64.7)          | 121 (62.4)          | 103 (69.6)          |       | 74 (66.7)            | 75 (61.0)           | 62 (65.3)            |       |
| OR              | 1 (ref)       | 1.03<br>(0.62–1.71) | 1.04<br>(0.65–1.68) | 1.38<br>(0.82–2.31) | 0.335 | 1.85<br>(1.04–3.27)* | 1.65<br>(0.96–2.84) | 1.98<br>(1.09–3.59)* | 0.028 |
| CAC ≥100, n (%) | 34 (18.8)     | 38 (22.8)           | 49 (25.3)           | 37 (25.0)           |       | 31 (27.9)            | 27 (22.0)           | 23 (24.2)            |       |
| OR              | 1 (ref)       | 1.12<br>(0.63–1.99) | 1.46<br>(0.85–2.52) | 1.42<br>(0.79–2.54) | 0.144 | 2.18<br>(1.17–4.08)* | 1.88<br>(0.99–3.56) | 2.18<br>(1.09–4.36)* | 0.103 |
| CAC ≥400, n (%) | 11 (6.1)      | 10 (6.0)            | 20 (10.3)           | 16 (10.8)           |       | 14 (12.6)            | 11 (8.9)            | 11 (11.6)            |       |
| OR              | 1 (ref)       | 0.88<br>(0.34–2.25) | 1.71<br>(0.75–3.93) | 1.84<br>(0.77–4.39) | 0.055 | 2.86<br>(1.14–7.13)* | 2.21<br>(0.84–5.82) | 2.99<br>(1.11–8.09)* | 0.084 |
| ABI <1.1, n (%) | 45 (24.9)     | 52 (31.1)           | 56 (28.9)           | 58 (39.2)           |       | 39 (35.1)            | 50 (40.7)           | 31 (32.6)            |       |
| OR              | 1 (ref)       | 1.20                | 1.19                | 1.83                | 0.032 | 1.60                 | 2.20                | 1.57                 | 0.025 |

|                   |               |                     |                      |                       |        |                      |                       |                       |        |
|-------------------|---------------|---------------------|----------------------|-----------------------|--------|----------------------|-----------------------|-----------------------|--------|
|                   |               | (0.74–1.96)         | (0.75–1.91)          | (1.12–2.99)*          |        | (0.94–2.74)          | (1.31–3.70)†          | (0.88–2.80)           |        |
| AoAC >0, n (%)    | 132<br>(72.9) | 139 (83.2)          | 168 (86.6)           | 135 (91.2)            |        | 92 (82.9)            | 103 (83.7)            | 81 (85.3)             |        |
| OR                | 1 (ref)       | 1.46<br>(0.71–3.00) | 2.55<br>(1.26–5.13)† | 5.05<br>(2.18–11.67)‡ | <0.001 | 3.82<br>(1.66–8.79)† | 4.15<br>(1.93–8.90)‡  | 5.40<br>(2.31–12.63)‡ | <0.001 |
| AoAC ≥100, n (%)  | 98 (54.1)     | 103 (61.7)          | 129 (66.5)           | 116 (78.4)            |        | 73 (65.8)            | 82 (66.7)             | 62 (65.3)             |        |
| OR                | 1 (ref)       | 0.95<br>(0.55–1.66) | 1.69<br>(0.99–2.89)  | 4.44<br>(2.36–8.34)‡  | <0.001 | 2.91<br>(1.49–5.68)† | 4.27<br>(2.25–8.10)‡  | 4.22<br>(2.10–8.47)‡  | <0.001 |
| AoAC ≥1000, n (%) | 30 (16.6)     | 46 (27.5)           | 71 (36.6)            | 54 (36.5)             |        | 34 (30.6)            | 42 (34.1)             | 27 (28.4)             |        |
| OR                | 1 (ref)       | 1.57<br>(0.86–2.86) | 3.39<br>(1.92–6.00)‡ | 3.31<br>(1.80–6.07)‡  | <0.001 | 2.95<br>(1.51–5.76)† | 6.04<br>(3.08–11.83)‡ | 4.02<br>(1.91–8.45)‡  | <0.001 |

Groups were divided according to tertiles of daily cigarette consumption in each smoker. All abbreviations are shown in Table 2. All values are expressed as ORs and ratios of expected counts with 95% confidence intervals. For dichotomous outcomes, logistic regression was used. For carotid plaque, negative binomial regression was used. Adjusted covariates are shown in Table 2.

\* $P < 0.05$ ; † $P < 0.01$ , ‡ $P < 0.001$ .

§987 (never, 174; former, 498 [daily cigarette consumption  $< 20$ , 164; 20, 188;  $\geq 21$ , 146]; current, 315 [daily cigarette consumption  $< 16$ , 104; 16–20, 118;  $\geq 21$ , 93]) men underwent measurement of carotid atherosclerosis.

**Table S3.** Association of smoking cessation interval with subclinical atherosclerosis in carotid, coronary, aortic, and peripheral vascular beds in 1019 men aged 40–79 years (SESSA, Shiga, Japan, 2006–2008)

|                                         | Current<br>(n = 329) | Cessation interval in former smokers |                              |                          | Never (n = 181)  | <i>P</i> for trend |
|-----------------------------------------|----------------------|--------------------------------------|------------------------------|--------------------------|------------------|--------------------|
|                                         |                      | <10.4 years<br>(n = 169)             | 10.4–24.3 years<br>(n = 170) | ≥24.4 years<br>(n = 170) |                  |                    |
| CIMT >1.0 mm, n (%)§                    | 45 (14.3)            | 32 (19.4)                            | 40 (24.0)                    | 33 (19.9)                | 22 (12.6)        |                    |
| OR                                      | 1 (ref)              | 1.06 (0.61–1.86)                     | 1.17 (0.68–2.02)             | 0.82 (0.47–1.43)         | 0.62 (0.31–1.24) | 0.143              |
| Carotid plaque, median<br>(25th, 75th)§ | 2 (0, 4)             | 2 (1, 4)                             | 2 (1, 4)                     | 2 (1, 4)                 | 2 (0, 3)         |                    |
| Ratio of expected counts                | 1 (ref)              | 1.03 (0.88–1.21)                     | 0.84 (0.71–0.99)*            | 0.82 (0.69–0.97)*        | 0.86 (0.72–1.05) | 0.046              |
| CAC >0, n (%)                           | 211 (64.1)           | 112 (66.3)                           | 108 (63.5)                   | 112 (65.9)               | 108 (59.7)       |                    |
| OR                                      | 1 (ref)              | 0.82 (0.52–1.29)                     | 0.54 (0.34–0.85)†            | 0.53 (0.33–0.83)†        | 0.61 (0.36–1.04) | 0.020              |



|                         |            |                  |                   |                   |                   |        |
|-------------------------|------------|------------------|-------------------|-------------------|-------------------|--------|
| CAC $\geq$ 100, n (%)   | 81 (24.6)  | 40 (23.7)        | 42 (24.7)         | 42 (24.7)         | 34 (18.8)         |        |
| OR                      | 1 (ref)    | 0.71 (0.43–1.17) | 0.65 (0.39–1.07)  | 0.58 (0.35–0.95)* | 0.49 (0.27–0.88)* | 0.012  |
| CAC $\geq$ 400, n (%)   | 36 (10.9)  | 15 (8.9)         | 21 (12.4)         | 10 (5.9)          | 11 (6.1)          |        |
| OR                      | 1 (ref)    | 0.58 (0.28–1.17) | 0.78 (0.40–1.52)  | 0.29 (0.13–0.67)† | 0.39 (0.16–0.97)* | 0.016  |
| ABI <1.1, n (%)         | 120 (36.5) | 63 (37.3)        | 54 (31.8)         | 49 (28.8)         | 45 (24.9)         |        |
| OR                      | 1 (ref)    | 0.97 (0.65–1.45) | 0.70 (0.46–1.06)  | 0.61 (0.40–0.94)* | 0.62 (0.37–1.03)  | 0.016  |
| AoAC >0, n (%)          | 276 (83.9) | 145 (85.8)       | 145 (85.3)        | 152 (89.4)        | 132 (72.9)        |        |
| OR                      | 1 (ref)    | 0.95 (0.47–1.94) | 0.48 (0.23–0.99)* | 0.37 (0.18–0.76)† | 0.43 (0.19–0.97)* | 0.017  |
| AoAC $\geq$ 100, n (%)  | 217 (66.0) | 119 (70.4)       | 119 (70.0)        | 110 (64.7)        | 98 (54.1)         |        |
| OR                      | 1 (ref)    | 0.86 (0.49–1.50) | 0.51 (0.29–0.88)* | 0.27 (0.16–0.46)† | 0.44 (0.23–0.82)* | <0.001 |
| AoAC $\geq$ 1000, n (%) | 103 (31.3) | 57 (33.7)        | 69 (40.6)         | 45 (26.5)         | 30 (16.6)         |        |
| OR                      | 1 (ref)    | 0.74 (0.45–1.22) | 0.87 (0.54–1.42)  | 0.37 (0.23–0.62)‡ | 0.29 (0.15–0.55)‡ | <0.001 |

The reference category is current smokers. Cessation interval groups were categorized according to tertiles of years since smoking cessation. All abbreviations are shown in Table 2. All values are expressed as ORs and ratios of expected counts with 95% confidence intervals. The statistical analyses are shown in Table 2. Adjusted covariates included age, body mass index, systolic blood pressure, total cholesterol, high-density lipoprotein cholesterol, medication for hypertension and dyslipidemia (yes/no), diabetes mellitus (yes/no), alcohol intake (g/week), exercise (yes/no), C-reactive protein, and daily cigarette consumption (for current smokers, daily amount of smoking; for former smokers, daily amount of prior smoking). The CT type was further included concomitantly when CAC and AoAC were analyzed.

\* $P < 0.05$ ; † $P < 0.01$ , ‡ $P < 0.001$ .

§987 (current, 315; former, 498 [cessation interval <10.4 years, 165; 10.4–24.3 years, 167; ≥24.4 years, 166]; never, 174) men underwent measurement of carotid atherosclerosis.

**Table S4.** Association of smoking cessation interval with subclinical atherosclerosis in the carotid, coronary, aortic, and peripheral vascular beds in 509 former smokers (SESSA, Shiga, Japan, 2006–2008)

|                                         | Never<br>(n = 181) | Cessation interval in former smokers |                              |                          | <i>P</i> for trend |
|-----------------------------------------|--------------------|--------------------------------------|------------------------------|--------------------------|--------------------|
|                                         |                    | ≥24.4 years<br>(n = 170)             | 10.4–24.3 years<br>(n = 170) | <10.4 years<br>(n = 169) |                    |
| CIMT >1.0 mm, n (%)§                    | 22 (12.6)          | 33 (19.9)                            | 40 (24.0)                    | 32 (19.4)                |                    |
| OR                                      | 1 (ref)            | 1.53 (0.81–2.90)                     | 2.32 (1.24–4.34)†            | 2.08 (1.08–3.98)*        | 0.013              |
| Carotid plaque, median<br>(25th, 75th)§ | 2 (0, 3)           | 2 (1, 4)                             | 2 (1, 4)                     | 2 (1, 4)                 |                    |
| Ratio of expected counts                | 1 (ref)            | 1.14 (0.94–1.39)                     | 1.25 (1.03–1.52)*            | 1.53 (1.26–1.85)‡        | <0.001             |
| CAC >0, n (%)                           | 108 (59.7)         | 112 (65.5)                           | 108 (63.5)                   | 112 (66.3)               |                    |
| OR                                      | 1 (ref)            | 0.94 (0.58–1.55)                     | 0.99 (0.60–1.63)             | 1.53 (0.92–2.53)         | 0.005              |

|                         |            |                  |                   |                    |        |
|-------------------------|------------|------------------|-------------------|--------------------|--------|
| CAC $\geq$ 100, n (%)   | 34 (18.8)  | 34 (18.8)        | 42 (24.7)         | 42 (24.7)          |        |
| OR                      | 1 (ref)    | 1.20 (0.69–2.10) | 1.35 (0.77–2.36)  | 1.48 (0.83–2.62)   | 0.008  |
| CAC $\geq$ 400, n (%)   | 11 (6.1)   | 10 (5.9)         | 21 (12.4)         | 15 (8.9)           |        |
| OR                      | 1 (ref)    | 0.79 (0.31–2.04) | 2.15 (0.94–4.91)  | 1.58 (0.65–3.79)   | 0.008  |
| ABI <1.1, n (%)         | 45 (24.9)  | 49 (28.8)        | 54 (31.8)         | 63 (37.3)          |        |
| OR                      | 1 (ref)    | 1.09 (0.67–1.77) | 1.29 (0.80–2.09)  | 1.80 (1.12–2.90)*  | 0.002  |
| AoAC >0, n (%)          | 132 (72.9) | 152 (89.4)       | 145 (85.3)        | 145 (85.8)         |        |
| OR                      | 1 (ref)    | 1.51 (0.74–3.10) | 2.23 (1.06–4.70)† | 4.90 (2.27–10.59)‡ | <0.001 |
| AoAC $\geq$ 100, n (%)  | 98 (54.1)  | 110 (64.7)       | 119 (70.0)        | 119 (70.4)         |        |
| OR                      | 1 (ref)    | 0.96 (0.56–1.63) | 2.10 (1.18–3.72)† | 3.69 (2.02–6.75)‡  | <0.001 |
| AoAC $\geq$ 1000, n (%) | 30 (16.6)  | 45 (26.5)        | 69 (40.6)         | 57 (33.7)          |        |
| OR                      | 1 (ref)    | 1.51 (0.84–2.73) | 3.77 (2.11–6.73)‡ | 3.18 (1.75–5.77)‡  | <0.001 |

The reference category is never smokers. Cessation interval groups were categorized according to tertiles of years since smoking cessation. All abbreviations are shown in Table 2. All values are expressed as ORs and ratios of expected counts with 95% confidence intervals. For dichotomous outcomes, logistic regression was used. For carotid plaque, negative binomial regression was used. Adjusted covariates are shown in Table 2.

\* $P < 0.05$ ; † $P < 0.01$ , ‡ $P < 0.001$ .

§987 (never, 174; 498 [cessation interval  $\geq 24.4$  years, 166; 10.4–24.3 years, 167;  $< 10.4$  years, 165]) men underwent measurement of carotid atherosclerosis.
